# Supplementary material
Source: publisher site journal article supplement (https://static.cambridge.org/content/id/urn:cambridge.org:id:article:S0266466620000298/resource/name/S0266466620000298supp001.pdf)
Supplement: Supplementary file 1 [file S0266466620000298supp001.pdf]

# Online Supplement

## Finite-sample size control of IVX-based tests in predictive regressions

by Mehdi Hosseinkouchack and Matei Demetrescu

### I Additional proofs

#### Proof of Lemma 1

Use the Phillips-Solo decomposition (see Phillips and Solo, 1992) of  $v_t$  to write  $v_t := \psi \nu_t + \Delta \tilde{v}_t$  where  $\tilde{v}_t$  is a linear process in  $\nu_t$  with absolutely summable coefficients (and as such uniformly  $L_r$ -bounded itself), leading to

$$x_t = \psi \sum_{j=0}^{t-1} \rho^j \nu_{t-j} + \tilde{v}_t - \rho^{t-1} \tilde{v}_1 + (\rho - 1) \sum_{j=1}^{t-1} \rho^{j-1} \tilde{v}_{t-j}.$$

Hence, Minkowski's norm inequality gives

$$\|x_t\|_r \leq \psi \left\| \sum_{j=0}^{t-1} \rho^j \nu_{t-j} \right\|_r + \|\tilde{v}_t\|_r + \rho^{t-1} \|\tilde{v}_1\|_r + |\rho - 1| \sum_{j=1}^{t-1} \rho^{j-1} \|\tilde{v}_{t-j}\|_r$$

such that  $\|x_t\|_r \leq \psi \left\| \sum_{j=0}^{t-1} \rho^j \nu_{t-j} \right\|_r + C$ . For  $r = 4$  we have with the iid property of  $\nu_t$

$$\mathbb{E} (x_t^4) = \sum_{i=0}^{t-1} \sum_{j=0}^{t-1} \sum_{k=0}^{t-1} \sum_{l=0}^{t-1} \rho^i \rho^j \rho^k \rho^l \mathbb{E} (\nu_{t-i} \nu_{t-j} \nu_{t-k} \nu_{t-l}) \leq CT^2$$

and  $T^{-1/2} x_t$  is thus uniformly  $L_4$ -bounded as required. A similar reasoning leads to the second part of the result.

#### Proof of Lemma 3

For computing the limit of  $\mathbb{E}(B_T)$ , note that

$$\begin{aligned} \Delta \tilde{x}_{t-1} &= (\rho - 1) \tilde{x}_{t-2} + \nu_{t-1} \\ &= (\rho - 1) \sum_{j=1}^{t-2} \rho^{j-1} \nu_{t-j-1} + \nu_{t-1} \end{aligned}$$

and thus

$$\tilde{z}_{t-1} = (1 - \rho L)_+^{-1} \Delta \tilde{x}_{t-1}$$

$$\begin{aligned}
&= (\rho - 1) (1 - \varrho L)_+^{-1} \sum_{j=1}^{t-2} \rho^{j-1} \nu_{t-j-1} + (1 - \varrho L)_+^{-1} \nu_{t-1} \\
&= (\rho - 1) (1 - \varrho L)_+^{-1} \sum_{j=1}^{t-2} \rho^{j-1} \nu_{t-j-1} + \sum_{j=0}^{t-2} \varrho^j \nu_{t-j-1} \\
&= \sum_{j=1}^{t-1} \frac{\varrho^{t-1-j} (1 - \varrho) - \rho^{t-1-j} (1 - \rho)}{\rho - \varrho} \nu_j \equiv \sum_{j=1}^{t-1} c_{j,t-1} \nu_j
\end{aligned}$$

by defining  $c_{t-1,t-1} = 1$ . We may then focus on  $E\left(\sum_{t=2}^T \tilde{z}_{t-1} u_t \cdot \sum_{t=2}^T \tilde{z}_{t-1}^2 u_t^2\right) = S_0$ ,

$$\begin{aligned}
S_0 &= E\left(\sum_{t=2}^T \tilde{z}_{t-1}^3 u_t^3\right) + E\left(\sum_{t=2}^T \sum_{s=2}^{t-1} \tilde{z}_{t-1} u_t \tilde{z}_{s-1}^2 u_s^2\right) + E\left(\sum_{t=2}^{T-1} \sum_{s=t+1}^T \tilde{z}_{t-1} u_t \tilde{z}_{s-1}^2 u_s^2\right) \\
&= E\left(\sum_{t=2}^T \tilde{z}_{t-1}^3 u_t^3\right) + E\left(\sum_{t=2}^{T-1} \sum_{s=t+1}^T \tilde{z}_{t-1} u_t \tilde{z}_{s-1}^2 u_s^2\right),
\end{aligned}$$

since  $E\left(\sum_{t=2}^T \tilde{z}_{t-1} u_t\right) = 0$ .

Let  $S_0 = S_{0,1} + S_{0,2}$ , with  $S_{0,1} = E\left(\sum_{t=2}^T \tilde{z}_{t-1}^3 u_t^3\right)$  and  $S_{0,2} = E\left(\sum_{t=2}^{T-1} \sum_{s=t+1}^T \tilde{z}_{t-1} u_t \tilde{z}_{s-1}^2 u_s^2\right)$ . We work out  $S_{0,2}$  first. Recall that

$$\tilde{z}_{t-1} = \sum_{j=1}^{t-1} c_{j,t-1} \nu_j \text{ with } c_{j,t-1} = \frac{\varrho^{t-1-j} (1 - \varrho) - \rho^{t-1-j} (1 - \rho)}{\rho - \varrho}.$$

Using the independence of shocks we obtain

$$\begin{aligned}
E\left(\tilde{z}_{t-1} u_t \tilde{z}_{s-1}^2\right) &= E\left(\left(\sum_{j=1}^{t-1} c_{j,t-1} \nu_j\right) u_t \left(\sum_{j=1}^{t-1} c_{j,s-1} \nu_j + \sum_{j=t}^{s-1} c_{j,s-1} \nu_j\right)^2\right) \\
&= 2 E\left(\left(\sum_{j=1}^{t-1} c_{j,t-1} \nu_j\right) u_t \left(\sum_{j=1}^{t-1} c_{j,s-1} \nu_j\right) \left(\sum_{j=t}^{s-1} c_{j,s-1} \nu_j\right)\right) \\
&= 2 \sigma_{uv}^2 \binom{t}{T} c_{t,s-1} \sum_{j=1}^{t-1} c_{j,t-1} c_{j,s-1} \sigma_v^2 \binom{j}{T}
\end{aligned}$$

which implies

$$E\left(\sum_{t=2}^{T-1} \sum_{s=t+1}^T \tilde{z}_{t-1} u_t \tilde{z}_{s-1}^2 u_s^2\right) = 2 \sum_{t=2}^{T-1} \sum_{s=t+1}^T \sum_{j=1}^{t-1} \sigma_u^2 \binom{s}{T} \sigma_{uv} \binom{t}{T} c_{t,s-1} c_{j,t-1} c_{j,s-1} \sigma_v^2 \binom{j}{T}.$$

Now since  $c_{j,t-1} = \frac{\varrho^{t-1-j}(1-\varrho) - \rho^{t-1-j}(1-\rho)}{\rho - \varrho} = \frac{1-\varrho}{\rho - \varrho} \left(\varrho^{t-1-j} - \frac{1-\rho}{1-\varrho} \rho^{t-1-j}\right)$  we have

$$\begin{aligned}
c_{t,s-1} c_{j,t-1} c_{j,s-1} &= \varrho^{2s-3-2j} - \frac{1-\rho}{1-\varrho} \varrho^{s-2-j} \rho^{s-1-j} - \frac{1-\rho}{1-\varrho} \varrho^{2s-2-t-j} \rho^{t-1-j} \\
&\quad + \left(\frac{1-\rho}{1-\varrho}\right)^2 \varrho^{s-1-t} \rho^{t+s-2-2j} - \frac{1-\rho}{1-\varrho} \varrho^{t+s-2-2j} \rho^{s-1-t}
\end{aligned} \tag{S.1}$$

$$\begin{aligned}
& + \left( \frac{1-\rho}{1-\varrho} \right)^2 \rho^{2s-2-t-j} \varrho^{t-1-j} \\
& + \left( \frac{1-\rho}{1-\varrho} \right)^2 \rho^{s-2-j} \varrho^{s-1-j} - \left( \frac{1-\rho}{1-\varrho} \right)^3 \rho^{2s-2j-3} \\
& = \sum_{k=1}^8 \alpha_k, \text{ say,}
\end{aligned}$$

where we have dropped the term  $\left( \frac{1-\varrho}{\rho-\varrho} \right)^3 = 1 + O(T^{\eta-1})$ . Further, those terms that have a factor of  $\left( \frac{1-\rho}{1-\varrho} \right)^2$  and the last term with  $\left( \frac{1-\rho}{1-\varrho} \right)^3$  are clearly dominated by the other terms and hence vanish. In the following we will, therefore, look only at the terms that are associated with  $\alpha_1$ ,  $\alpha_2$ ,  $\alpha_3$  and  $\alpha_5$ .

We start by focusing on the first term stemming from  $c_{t,s-1}c_{j,t-1}c_{j,s-1}$ , namely  $\varrho^{2s-2j-3}$ .

$$S_{0,2}^{(\alpha_1)} = \sum_{t=2}^{T-1} \sigma_{uv} \left( \frac{t}{T} \right) \sum_{s=t+1}^T \sum_{j=1}^{t-1} \sigma_u^2 \left( \frac{s}{T} \right) \varrho^{2s-2j-3} \sigma_v^2 \left( \frac{j}{T} \right).$$

Note here that  $1 < j < t < s \leq T$  hence

$$\begin{aligned}
\left| \sigma_u^2 \left( \frac{s}{T} \right) - \sigma_u^2 \left( \frac{t}{T} \right) \right| & < C \frac{|s-t|}{T} < C \frac{|s-j|}{T}, \\
\left| \sigma_v^2 \left( \frac{j}{T} \right) - \sigma_v^2 \left( \frac{t}{T} \right) \right| & < C \frac{|t-j|}{T} < C \frac{|s-j|}{T},
\end{aligned}$$

and

$$\left| \sigma_u^2 \left( \frac{s}{T} \right) - \sigma_u^2 \left( \frac{t}{T} \right) \right| \left| \sigma_v^2 \left( \frac{j}{T} \right) - \sigma_v^2 \left( \frac{t}{T} \right) \right| < C \frac{(s-j)^2}{T^2}.$$

Now as

$$\begin{aligned}
S_{0,2}^{(\alpha_1)} & = \sum_{t=2}^{T-1} \sigma_{uv} \left( \frac{t}{T} \right) \sum_{s=t+1}^T \sum_{j=1}^{t-1} \left( \sigma_u^2 \left( \frac{s}{T} \right) - \sigma_u^2 \left( \frac{t}{T} \right) + \sigma_u^2 \left( \frac{t}{T} \right) \right) \varrho^{2s-2j-3} \left( \sigma_v^2 \left( \frac{j}{T} \right) - \sigma_v^2 \left( \frac{t}{T} \right) + \sigma_v^2 \left( \frac{t}{T} \right) \right) \\
& = \sum_{t=2}^{T-1} \sigma_{uv} \left( \frac{t}{T} \right) \sum_{s=t+1}^T \sum_{j=1}^{t-1} \left( \sigma_u^2 \left( \frac{s}{T} \right) - \sigma_u^2 \left( \frac{t}{T} \right) \right) \left( \sigma_v^2 \left( \frac{j}{T} \right) - \sigma_v^2 \left( \frac{t}{T} \right) \right) \varrho^{2s-2j-3} \\
& \quad + \sum_{t=2}^{T-1} \sigma_{uv} \left( \frac{t}{T} \right) \sum_{s=t+1}^T \sum_{j=1}^{t-1} \left( \sigma_u^2 \left( \frac{s}{T} \right) - \sigma_u^2 \left( \frac{t}{T} \right) \right) \sigma_v^2 \left( \frac{t}{T} \right) \varrho^{2s-2j-3} \\
& \quad + \sum_{t=2}^{T-1} \sigma_{uv} \left( \frac{t}{T} \right) \sum_{s=t+1}^T \sum_{j=1}^{t-1} \sigma_u^2 \left( \frac{t}{T} \right) \varrho^{2s-2j-3} \left( \sigma_v^2 \left( \frac{j}{T} \right) - \sigma_v^2 \left( \frac{t}{T} \right) \right) \\
& \quad + \sum_{t=2}^{T-1} \sigma_{uv} \left( \frac{t}{T} \right) \sum_{s=t+1}^T \sum_{j=1}^{t-1} \sigma_u^2 \left( \frac{t}{T} \right) \varrho^{2s-2j-3} \left( \sigma_v^2 \left( \frac{t}{T} \right) \right),
\end{aligned}$$

we may write

$$\left| S_{0,2}^{(\alpha_1)} - \sum_{t=2}^{T-1} \sigma_{uv} \left( \frac{t}{T} \right) \sigma_u^2 \left( \frac{t}{T} \right) \sigma_v^2 \left( \frac{t}{T} \right) \sum_{s=t+1}^T \sum_{j=1}^{t-1} \varrho^{2s-2j-3} \right|$$

$$\begin{aligned}
&\leq \sum_{t=2}^{T-1} \sigma_{uv} \left( \frac{t}{T} \right) \sum_{s=t+1}^T \sum_{j=1}^{t-1} \left| \sigma_u^2 \left( \frac{s}{T} \right) - \sigma_u^2 \left( \frac{t}{T} \right) \right| \left| \sigma_v^2 \left( \frac{j}{T} \right) - \sigma_v^2 \left( \frac{t}{T} \right) \right| \varrho^{2s-2j-3} \\
&\quad + \sum_{t=2}^{T-1} \sigma_{uv} \left( \frac{t}{T} \right) \sum_{s=t+1}^T \sum_{j=1}^{t-1} \left| \sigma_u^2 \left( \frac{s}{T} \right) - \sigma_u^2 \left( \frac{t}{T} \right) \right| \sigma_v^2 \left( \frac{t}{T} \right) \varrho^{2s-2j-3} \\
&\quad + \sum_{t=2}^{T-1} \sigma_{uv} \left( \frac{t}{T} \right) \sum_{s=t+1}^T \sum_{j=1}^{t-1} \sigma_u^2 \left( \frac{t}{T} \right) \left| \sigma_v^2 \left( \frac{j}{T} \right) - \sigma_v^2 \left( \frac{t}{T} \right) \right| \varrho^{2s-2j-3} \\
&\leq \frac{C}{T^2} \sum_{t=2}^{T-1} \sum_{s=t+1}^T \sum_{j=1}^{t-1} (s-j)^2 \varrho^{2s-2j-3} + \frac{C}{T} \sum_{t=2}^{T-1} \sum_{s=t+1}^T \sum_{j=1}^{t-1} (s-t) \varrho^{2s-2j-3} + \frac{C}{T} \sum_{t=2}^{T-1} \sum_{s=t+1}^T \sum_{j=1}^{t-1} \varrho^{2s-2j-3} (j-t).
\end{aligned}$$

Now note that

$$\begin{aligned}
\sum_{t=2}^{T-1} \sum_{s=t+1}^T \sum_{j=1}^{t-1} (s-j)^2 \varrho^{2s-2j} &= -\frac{2\varrho^4 (4 + 7\varrho^2 + \varrho^4) (1 - \varrho^{2T})}{(1 - \varrho^2)^5} + \frac{2\varrho^4 (2 + \varrho^2) + \varrho^{2+2T} (1 + 12\varrho^2 + 5\varrho^4)}{(1 - \varrho^2)^4} T \\
&\quad + \frac{2\varrho^{2+2T} (1 + 2\varrho^2)}{(1 - \varrho^2)^3} T^2 + \frac{\varrho^{2+2T}}{(1 - \varrho^2)^2} T^3 \\
&= O(T^{4\eta+1}),
\end{aligned}$$

and in the same way we can show that

$$\sum_{t=2}^{T-1} \sum_{s=t+1}^T \sum_{j=1}^{t-1} (s-t) \varrho^{2s-2j-3} = O(T^{3\eta+1}) = \sum_{t=2}^{T-1} \sum_{s=t+1}^T \sum_{j=1}^{t-1} \varrho^{2s-2j-3} (j-t).$$

Therefore

$$\begin{aligned}
&\left| S_{0,2}^{(\alpha_1)} - \sum_{t=2}^{T-1} \sigma_{uv} \left( \frac{t}{T} \right) \sigma_u^2 \left( \frac{t}{T} \right) \sigma_v^2 \left( \frac{t}{T} \right) \sum_{s=t+1}^T \sum_{j=1}^{t-1} \varrho^{2s-2j-3} \right| \\
&\leq \frac{C}{T^2} \sum_{t=2}^{T-1} \sum_{s=t+1}^T \sum_{j=1}^{t-1} (s-j)^2 \varrho^{2s-2j-3} + \frac{C}{T} \sum_{t=2}^{T-1} \sum_{s=t+1}^T \sum_{j=1}^{t-1} (s-t) \varrho^{2s-2j-3} + \frac{C}{T} \sum_{t=2}^{T-1} \sum_{s=t+1}^T \sum_{j=1}^{t-1} \varrho^{2s-2j-3} (j-t) \\
&= O(T^{4\eta-1}) + O(T^{3\eta}) = O(T^{3\eta}), \text{ since } 3\eta > 4\eta - 1.
\end{aligned}$$

The latter in turn implies

$$T^{1/2-\eta/2} \frac{1}{T^{1/2+\eta/2}} \frac{1}{T^{1+\eta}} \times \left| S_{0,2}^{(\alpha_1)} - \sum_{t=2}^{T-1} \sigma_{uv} \left( \frac{t}{T} \right) \sigma_u^2 \left( \frac{t}{T} \right) \sigma_v^2 \left( \frac{t}{T} \right) \sum_{s=t+1}^T \sum_{j=1}^{t-1} \varrho^{2s-2j-3} \right| = O(T^{\eta-1}).$$

We will now show that

$$T^{1/2-\eta/2} \frac{1}{T^{1/2+\eta/2}} \frac{1}{T^{1+\eta}} \sum_{t=2}^{T-1} \sigma_{uv} \left( \frac{t}{T} \right) \sigma_u^2 \left( \frac{t}{T} \right) \sigma_v^2 \left( \frac{t}{T} \right) \sum_{s=t+1}^T \sum_{j=1}^{t-1} \varrho^{2s-2j-3} = \frac{1}{4a^2} \int_0^1 \sigma_{uv}(x) \sigma_u^2(x) \sigma_v^2(x) dx + O(T^\eta)$$

First observe that

$$\sum_{s=t+1}^T \sum_{j=1}^{t-1} \varrho^{2s-2j} = \frac{\varrho^4 - \varrho^{2t+2} + \varrho^{2T+2} - \varrho^{2T-2t+4}}{(1 - \varrho^2)^2}.$$

Hence we have

$$\begin{aligned}
& \frac{1}{T^{1/2+\eta/2}} \frac{1}{T^{1+\eta}} \sum_{t=2}^{T-1} \sigma_{uv}^2 \left( \frac{t}{T} \right) \sigma_u^2 \left( \frac{t}{T} \right) \sigma_v^2 \left( \frac{t}{T} \right) \sum_{s=t+1}^T \sum_{j=1}^{t-1} \varrho^{2s-2j} \\
= & \frac{1}{T^{3/2+3\eta/2}} \frac{\varrho^4}{(1-\varrho)^2 (1+\varrho)^2} \sum_{t=2}^{T-1} \sigma_{uv}^2 \left( \frac{t}{T} \right) \sigma_u^2 \left( \frac{t}{T} \right) \sigma_v^2 \left( \frac{t}{T} \right) \\
& - \frac{1}{T^{3/2+3\eta/2}} \frac{1}{(1-\varrho^2)^2} \sum_{t=2}^{T-1} \sigma_{uv}^2 \left( \frac{t}{T} \right) \sigma_u^2 \left( \frac{t}{T} \right) \sigma_v^2 \left( \frac{t}{T} \right) \varrho^{2t+2} \\
& + \frac{1}{T^{3/2+3\eta/2}} \frac{\varrho^{2T+2}}{(1-\varrho^2)^2} \sum_{t=2}^{T-1} \sigma_{uv}^2 \left( \frac{t}{T} \right) \sigma_u^2 \left( \frac{t}{T} \right) \sigma_v^2 \left( \frac{t}{T} \right) \\
& - \frac{1}{T^{3/2+3\eta/2}} \frac{1}{(1-\varrho^2)^2} \sum_{t=2}^{T-1} \sigma_{uv}^2 \left( \frac{t}{T} \right) \sigma_u^2 \left( \frac{t}{T} \right) \sigma_v^2 \left( \frac{t}{T} \right) \varrho^{2T-2t+4} \\
= & \frac{1}{T^{3/2+3\eta/2}} \frac{(1-aT^{-\eta})^4}{(aT^{-\eta})^2 (2+aT^{-\eta})^2} \sum_{t=2}^{T-1} \sigma_{uv}^2 \left( \frac{t}{T} \right) \sigma_u^2 \left( \frac{t}{T} \right) \sigma_v^2 \left( \frac{t}{T} \right) + R_1^{(\alpha_1)} + R_2^{(\alpha_1)} + R_3^{(\alpha_1)}.
\end{aligned}$$

For  $R_1^{(\alpha_1)}$  note that

$$\begin{aligned}
\left| R_1^{(\alpha_1)} \right| &= \frac{1}{T^{3/2+3\eta/2}} \frac{1}{(1-\varrho^2)^2} \sum_{t=2}^{T-1} \sigma_{uv}^2 \left( \frac{t}{T} \right) \sigma_u^2 \left( \frac{t}{T} \right) \sigma_v^2 \left( \frac{t}{T} \right) \varrho^{2t+2} \\
&\leq \frac{C}{T^{3/2-\eta/2}} \sum_{t=2}^{T-1} \varrho^{2t} = O\left(T^{-3/2+3\eta/2}\right).
\end{aligned}$$

$R_2^{(\alpha_1)} = \frac{1}{T^{3/2+3\eta/2}} \frac{\varrho^{2T+2}}{(1-\varrho^2)^2} \sum_{t=2}^{T-1} \sigma_{uv}^2 \left( \frac{t}{T} \right) \sigma_u^2 \left( \frac{t}{T} \right) \sigma_v^2 \left( \frac{t}{T} \right)$  is clearly dominated by  $R_1^{(\alpha_1)}$  and for  $R_3^{(\alpha_1)}$  we have

$$\begin{aligned}
\left| R_3^{(\alpha_1)} \right| &= \frac{1}{T^{3/2+3\eta/2}} \frac{1}{(1-\varrho^2)^2} \sum_{t=2}^{T-1} \sigma_{uv}^2 \left( \frac{t}{T} \right) \sigma_u^2 \left( \frac{t}{T} \right) \sigma_v^2 \left( \frac{t}{T} \right) \varrho^{2T-2t+4} \\
&\leq \frac{C}{T^{3/2-\eta/2}} \sum_{t=2}^{T-1} \varrho^{2T-2t} = O\left(T^{-3/2+3\eta/2}\right).
\end{aligned}$$

Further, note that  $T^{1/2-\eta/2} \left| R_1^{(\alpha_1)} + R_2^{(\alpha_1)} + R_3^{(\alpha_1)} \right| = O\left(T^{-1+\eta}\right)$ , hence

$$\begin{aligned}
& T^{1/2-\eta/2} \frac{1}{T^{1/2+\eta/2}} \frac{1}{T^{1+\eta}} \sum_{t=2}^{T-1} \sigma_{uv}^2 \left( \frac{t}{T} \right) \sigma_u^2 \left( \frac{t}{T} \right) \sigma_v^2 \left( \frac{t}{T} \right) \sum_{s=t+1}^T \sum_{j=1}^{t-1} \varrho^{2s-2j-3} \\
= & T^{1/2-\eta/2} \frac{1}{T^{1/2+\eta/2}} \frac{1}{T^{1+\eta}} \sum_{t=2}^{T-1} \sigma_{uv}^2 \left( \frac{t}{T} \right) \sigma_u^2 \left( \frac{t}{T} \right) \sigma_v^2 \left( \frac{t}{T} \right) \frac{\varrho^4 - \varrho^{2t+2} + \varrho^{2T+2} - \varrho^{2T-2t+4}}{(1-\varrho^2)^2} \\
= & T^{1/2-\eta/2} \frac{1}{T^{1/2+3\eta/2}} \frac{\varrho}{(1-\varrho^2)^2} \frac{1}{T} \sum_{t=2}^{T-1} \sigma_{uv}^2 \left( \frac{t}{T} \right) \sigma_u^2 \left( \frac{t}{T} \right) \sigma_v^2 \left( \frac{t}{T} \right) + O\left(T^{\eta-1}\right) \\
= & \frac{1}{a^2} \frac{(1-aT^{-\eta})}{(2-aT^{-\eta})^2} \frac{1}{T} \sum_{t=2}^{T-1} \sigma_{uv}^2 \left( \frac{t}{T} \right) \sigma_u^2 \left( \frac{t}{T} \right) \sigma_v^2 \left( \frac{t}{T} \right) + O\left(T^{\eta-1}\right)
\end{aligned}$$

$$\rightarrow \frac{1}{4a^2} \int_0^1 \sigma_{uv}(x) \sigma_u^2(x) \sigma_v^2(x) dx.$$

Putting all these arguments together we have

$$T^{1/2-\eta/2} \frac{1}{T^{1/2+\eta/2}} \frac{1}{T^{1+\eta}} S_{0,2}^{(\alpha_1)} \rightarrow \frac{1}{4a^2} \int_0^1 \sigma_{uv}(x) \sigma_u^2(x) \sigma_v^2(x) dx. \quad (\text{S.2})$$

We now turn to the second term stemming from  $c_{t,s-1} c_{j,t-1} c_{j,s-1}$  and given as  $\alpha_2$  below (S.1), leading to the analysis of

$$S_{0,2}^{(\alpha_2)} = -\frac{1-\rho}{1-\varrho} \sum_{t=2}^{T-1} \sum_{s=t+1}^T \sum_{j=1}^{t-1} \sigma_u^2\left(\frac{s}{T}\right) \sigma_{uv}\left(\frac{t}{T}\right) \varrho^{s-2-j} \rho^{s-1-j} \sigma_v^2\left(\frac{j}{T}\right).$$

Following the same lines of arguments as for  $S_{0,2}^{(\alpha_1)}$  and noting that

$$\begin{aligned} \frac{C}{T} \sum_{t=2}^{T-1} \sum_{s=t+1}^T \sum_{j=1}^{t-1} (s-t) \varrho^{s-2-j} \rho^{s-1-j} &= O(T^{3\eta}) \\ \frac{C}{T} \sum_{t=2}^{T-1} \sum_{s=t+1}^T \sum_{j=1}^{t-1} (j-t) \varrho^{s-2-j} \rho^{s-1-j} &= O(T^{3\eta}) \end{aligned}$$

and as

$$\frac{C}{T^2} \sum_{t=2}^{T-1} \sum_{s=t+1}^T \sum_{j=1}^{t-1} (s-j)^2 \varrho^{s-2-j} \rho^{s-1-j} = O(T^{5\eta-2})$$

we have that

$$\begin{aligned} &T^{1/2-\eta/2} \frac{1}{T^{1/2+\eta/2}} \frac{1}{T^{1+\eta}} \cdot \frac{1}{\varrho^2 \rho} \times \\ &\left| \sum_{t=2}^{T-1} \sigma_{uv}^2\left(\frac{t}{T}\right) \sum_{s=t+1}^T \sum_{j=1}^{t-1} \sigma_u^2\left(\frac{s}{T}\right) (\varrho\rho)^{s-j} \sigma_v^2\left(\frac{j}{T}\right) - \sum_{t=2}^{T-1} \sigma_{uv}^2\left(\frac{t}{T}\right) \sigma_u^2\left(\frac{t}{T}\right) \sigma_v^2\left(\frac{t}{T}\right) \sum_{s=t+1}^T \sum_{j=1}^{t-1} (\varrho\rho)^{s-j} \right| \end{aligned}$$

is of order  $T^{1/2-\eta/2} O\left(T^{-\frac{3}{2}\eta-\frac{3}{2}}\right) O(T^{4\eta-1}) = O(T^{\eta-1})$ .

Next observe that

$$\sum_{s=t+1}^T \sum_{j=1}^{t-1} \varrho^{s-2-j} \rho^{s-1-j} = \frac{\rho - \rho^t \varrho^{t-1} + \varrho^{T-1} \rho^T - \varrho^{T-t} \rho^{T-t+1}}{(1-\rho\varrho)^2}.$$

Therefore

$$\begin{aligned} &\frac{1}{T^{1/2+\eta/2}} \frac{1}{T^{1+\eta}} \sum_{t=2}^{T-1} \sigma_{uv}^2\left(\frac{t}{T}\right) \sigma_u^2\left(\frac{t}{T}\right) \sigma_v^2\left(\frac{t}{T}\right) \sum_{s=t+1}^T \sum_{j=1}^{t-1} \varrho^{s-2-j} \rho^{s-1-j} \\ &= \frac{1}{T^{3/2+3\eta/2}} \frac{\rho}{(1-\rho\varrho)^2} \sum_{t=2}^{T-1} \sigma_{uv}^2\left(\frac{t}{T}\right) \sigma_u^2\left(\frac{t}{T}\right) \sigma_v^2\left(\frac{t}{T}\right) \end{aligned}$$

$$\begin{aligned}
& -\frac{1}{T^{3/2+3\eta/2}} \frac{1}{(1-\rho\varrho)^2} \sum_{t=2}^{T-1} \sigma_{uv}^2\left(\frac{t}{T}\right) \sigma_u^2\left(\frac{t}{T}\right) \sigma_v^2\left(\frac{t}{T}\right) \rho^t \varrho^{t-1} \\
& + \frac{1}{T^{3/2+3\eta/2}} \frac{\varrho^{T-1} \rho^T}{(1-\rho\varrho)^2} \sum_{t=2}^{T-1} \sigma_{uv}^2\left(\frac{t}{T}\right) \sigma_u^2\left(\frac{t}{T}\right) \sigma_v^2\left(\frac{t}{T}\right) \\
& - \frac{1}{T^{3/2+3\eta/2}} \frac{1}{(1-\rho\varrho)^2} \sum_{t=2}^{T-1} \sigma_{uv}^2\left(\frac{t}{T}\right) \sigma_u^2\left(\frac{t}{T}\right) \sigma_v^2\left(\frac{t}{T}\right) \varrho^{T-t} \rho^{T-t+1} \\
= & \frac{1}{T^{3/2+3\eta/2}} \frac{\rho}{(1-\rho\varrho)^2} \sum_{t=2}^{T-1} \sigma_{uv}^2\left(\frac{t}{T}\right) \sigma_u^2\left(\frac{t}{T}\right) \sigma_v^2\left(\frac{t}{T}\right) + R_1^{(\alpha_2)} + R_2^{(\alpha_2)} + R_3^{(\alpha_2)},
\end{aligned}$$

for which again one can elementarily show that  $R_1^{(\alpha_2)}$ ,  $R_2^{(\alpha_2)}$  and  $R_3^{(\alpha_2)}$  are  $o(T^{\eta/2-1/2})$  and since  $\frac{\rho}{(1-\rho\varrho)^2} = O(T^{2\eta})$ , we have

$$\frac{T^{1/2-\eta/2}}{T^{3/2+3\eta/2}} \frac{\rho}{(1-\rho\varrho)^2} \sum_{t=2}^{T-1} \sigma_{uv}^2\left(\frac{t}{T}\right) \sigma_u^2\left(\frac{t}{T}\right) \sigma_v^2\left(\frac{t}{T}\right) \rightarrow \frac{1}{a^2} \int_0^1 \sigma_{uv}(x) \sigma_u^2(x) \sigma_v^2(x) dx.$$

Since  $\frac{1-\rho}{1-\varrho} = O(T^{\eta-1})$ , we obtain

$$T^{1/2-\eta/2} S_{0,2}^{(\alpha_2)} = O(T^{\eta-1}). \tag{S.3}$$

We now turn to the third term stemming from  $c_{t,s-1} c_{j,t-1} c_{j,s-1}$  and given as  $\alpha_3$  below (S.1),  $\alpha_3 = \frac{1-\rho}{1-\varrho} \varrho^{2s-2-t-j} \rho^{t-1-j}$ , i.e. we analyze

$$S_{0,2}^{(\alpha_3)} = -\frac{1-\rho}{1-\varrho} \sum_{t=2}^{T-1} \sum_{s=t+1}^T \sum_{j=1}^{t-1} \sigma_u^2\left(\frac{s}{T}\right) \sigma_{uv}\left(\frac{t}{T}\right) \varrho^{2s-2-t-j} \rho^{t-1-j} \sigma_v^2\left(\frac{j}{T}\right).$$

Here note that

$$\begin{aligned}
\frac{C}{T} \sum_{t=2}^{T-1} \sum_{s=t+1}^T \sum_{j=1}^{t-1} (s-t) \varrho^{2s-2-t-j} \rho^{t-1-j} &= O(T^{3\eta}) \\
\frac{C}{T} \sum_{t=2}^{T-1} \sum_{s=t+1}^T \sum_{j=1}^{t-1} (j-t) \varrho^{2s-2-t-j} \rho^{t-1-j} &= O(T^{3\eta})
\end{aligned}$$

and as

$$\frac{C}{T^2} \sum_{t=2}^{T-1} \sum_{s=t+1}^T \sum_{j=1}^{t-1} (s-j)^2 \varrho^{2s-2-t-j} \rho^{t-1-j} = O(T^{5\eta-2})$$

we have

$$\begin{aligned}
& T^{1/2-\eta/2} \frac{1}{T^{1/2+\eta/2}} \frac{1}{T^{1+\eta}} \times \\
& \left| \sum_{t=2}^{T-1} \sigma_{uv}^2\left(\frac{t}{T}\right) \sum_{s=t+1}^T \sum_{j=1}^{t-1} \sigma_u^2\left(\frac{s}{T}\right) \varrho^{2s-2-t-j} \rho^{t-1-j} \sigma_v^2\left(\frac{j}{T}\right) \right| -
\end{aligned}$$

$$\begin{aligned} & \left| \sum_{t=2}^{T-1} \sigma_{uv}^2 \left( \frac{t}{T} \right) \sigma_u^2 \left( \frac{t}{T} \right) \sigma_v^2 \left( \frac{t}{T} \right) \sum_{s=t+1}^T \sum_{j=1}^{t-1} \varrho^{2s-2-t-j} \rho^{t-1-j} \right| \\ &= T^{1/2-\eta/2} O \left( T^{-\frac{3}{2}\eta-\frac{3}{2}} \right) O \left( T^{3\eta} \right) = O \left( T^{\eta-1} \right). \end{aligned}$$

Next observe that

$$\sum_{s=t+1}^T \sum_{j=1}^{t-1} \varrho^{2s-2-t-j} \rho^{t-1-j} = \frac{(1-\varrho^{2T-2t})(\varrho\rho-\varrho^t\rho^t)}{(1-\varrho^2)\rho(1-\varrho\rho)}.$$

Therefore

$$\begin{aligned} & \frac{1}{T^{1/2+\eta/2}} \frac{1}{T^{1+\eta}} \sum_{t=2}^{T-1} \sigma_{uv}^2 \left( \frac{t}{T} \right) \sigma_u^2 \left( \frac{t}{T} \right) \sigma_v^2 \left( \frac{t}{T} \right) \sum_{s=t+1}^T \sum_{j=1}^{t-1} \varrho^{2s-2-t-j} \rho^{t-1-j} \\ &= \frac{1}{T^{3/2+3\eta/2}} \frac{\varrho}{(1-\varrho^2)\rho(1-\varrho\rho)} \sum_{t=2}^{T-1} \sigma_{uv}^2 \left( \frac{t}{T} \right) \sigma_u^2 \left( \frac{t}{T} \right) \sigma_v^2 \left( \frac{t}{T} \right) \\ & \quad - \frac{1}{T^{3/2+3\eta/2}} \frac{1}{(1-\varrho^2)\rho(1-\varrho\rho)} \sum_{t=2}^{T-1} \sigma_{uv}^2 \left( \frac{t}{T} \right) \sigma_u^2 \left( \frac{t}{T} \right) \sigma_v^2 \left( \frac{t}{T} \right) \rho^t \varrho^t \\ & \quad + \frac{1}{T^{3/2+3\eta/2}} \frac{1}{(1-\varrho^2)\rho(1-\varrho\rho)} \sum_{t=2}^{T-1} \sigma_{uv}^2 \left( \frac{t}{T} \right) \sigma_u^2 \left( \frac{t}{T} \right) \sigma_v^2 \left( \frac{t}{T} \right) \varrho^{2T-2t} \rho^t \varrho^t \\ & \quad - \frac{1}{T^{3/2+3\eta/2}} \frac{\varrho}{(1-\varrho^2)(1-\varrho\rho)} \sum_{t=2}^{T-1} \sigma_{uv}^2 \left( \frac{t}{T} \right) \sigma_u^2 \left( \frac{t}{T} \right) \sigma_v^2 \left( \frac{t}{T} \right) \varrho^{2T-2t} \\ &= \frac{1}{T^{3/2+3\eta/2}} \frac{\varrho}{(1-\varrho^2)(1-\varrho\rho)} \sum_{t=2}^{T-1} \sigma_{uv}^2 \left( \frac{t}{T} \right) \sigma_u^2 \left( \frac{t}{T} \right) \sigma_v^2 \left( \frac{t}{T} \right) + R_1^{(\alpha_3)} + R_2^{(\alpha_3)} + R_3^{(\alpha_3)}, \end{aligned}$$

for which again one can elementarily show that  $R_1^{(\alpha_3)}$ ,  $R_2^{(\alpha_3)}$  and  $R_3^{(\alpha_3)}$  are  $o(T^{\eta/2-1/2})$  and since  $\frac{\varrho}{(1-\varrho^2)\rho(1-\varrho\rho)} = O(T^{2\eta})$ , we have

$$\frac{T^{1/2-\eta/2}}{T^{3/2+3\eta/2}} \frac{\varrho}{(1-\varrho^2)(1-\rho^2)} \sum_{t=2}^{T-1} \sigma_{uv}^2 \left( \frac{t}{T} \right) \sigma_u^2 \left( \frac{t}{T} \right) \sigma_v^2 \left( \frac{t}{T} \right) \rightarrow \frac{1}{a^2} \int_0^1 \sigma_{uv}(x) \sigma_u^2(x) \sigma_v^2(x) dx.$$

Now as  $\frac{1-\rho}{1-\varrho} = O(T^{\eta-1})$  we obtain

$$T^{1/2-\eta/2} S_{0,2}^{(\alpha_3)} = O(T^{\eta-1}). \quad (\text{S.4})$$

Finally we turn to the  $\alpha_5$  given under (S.1):  $\frac{1-\rho}{1-\varrho} \varrho^{t+s-2-2j} \rho^{s-1-t}$

$$S_{0,2}^{(\alpha_5)} = -\frac{1-\rho}{1-\varrho} \sum_{t=2}^{T-1} \sum_{s=t+1}^T \sum_{j=1}^{t-1} \sigma_u^2 \left( \frac{s}{T} \right) \sigma_{uv} \left( \frac{t}{T} \right) \varrho^{t+s-2-2j} \rho^{s-1-t} \sigma_v^2 \left( \frac{j}{T} \right).$$

Here note that

$$\frac{C}{T} \sum_{t=2}^{T-1} \sum_{s=t+1}^T \sum_{j=1}^{t-1} (s-t) \varrho^{t+s-2-2j} \rho^{s-1-t} = O(T^{3\eta}) = \frac{C}{T} \sum_{t=2}^{T-1} \sum_{s=t+1}^T \sum_{j=1}^{t-1} (j-t) \varrho^{t+s-2-2j} \rho^{s-1-t},$$



and as  $\frac{C}{T^2} \sum_{t=2}^{T-1} \sum_{s=t+1}^T \sum_{j=1}^{t-1} (s-j)^2 \varrho^{t+s-2-2j} \rho^{s-1-t} = O(T^{5\eta-2})$  we have

$$\begin{aligned} & T^{1/2-\eta/2} \frac{1}{T^{1/2+\eta/2}} \frac{1}{T^{1+\eta}} \times \\ & \left| \sum_{t=2}^{T-1} \sigma_{uv}^2 \left( \frac{t}{T} \right) \sum_{s=t+1}^T \sum_{j=1}^{t-1} \sigma_u^2 \left( \frac{s}{T} \right) \varrho^{t+s-2-2j} \rho^{s-1-t} \sigma_v^2 \left( \frac{j}{T} \right) \right. \\ & \left. - \sum_{t=2}^{T-1} \sigma_{uv}^2 \left( \frac{t}{T} \right) \sigma_u^2 \left( \frac{t}{T} \right) \sigma_v^2 \left( \frac{t}{T} \right) \sum_{s=t+1}^T \sum_{j=1}^{t-1} \varrho^{t+s-2-2j} \rho^{s-1-t} \right| \\ & = T^{1/2-\eta/2} O \left( T^{-\frac{3}{2}\eta-\frac{3}{2}} \right) O(T^{3\eta}) = O(T^{\eta-1}). \end{aligned}$$

Next observe that

$$\sum_{s=t+1}^T \sum_{j=1}^{t-1} \varrho^{t+s-2-2j} \rho^{s-1-t} = \frac{(\varrho - \varrho^{2t-1})(1 - \varrho^{T-t} \rho^{T-t})}{(1 - \varrho^2)(1 - \varrho\rho)}.$$

Therefore

$$\begin{aligned} & \frac{1}{T^{1/2+\eta/2}} \frac{1}{T^{1+\eta}} \sum_{t=2}^{T-1} \sigma_{uv}^2 \left( \frac{t}{T} \right) \sigma_u^2 \left( \frac{t}{T} \right) \sigma_v^2 \left( \frac{t}{T} \right) \sum_{s=t+1}^T \sum_{j=1}^{t-1} \varrho^{t+s-2-2j} \rho^{s-1-t} \\ & = \frac{1}{T^{3/2+3\eta/2}} \frac{\varrho}{(1 - \varrho^2)(1 - \varrho\rho)} \sum_{t=2}^{T-1} \sigma_{uv}^2 \left( \frac{t}{T} \right) \sigma_u^2 \left( \frac{t}{T} \right) \sigma_v^2 \left( \frac{t}{T} \right) \\ & \quad - \frac{1}{T^{3/2+3\eta/2}} \frac{1}{(1 - \varrho^2)(1 - \varrho\rho)} \sum_{t=2}^{T-1} \sigma_{uv}^2 \left( \frac{t}{T} \right) \sigma_u^2 \left( \frac{t}{T} \right) \sigma_v^2 \left( \frac{t}{T} \right) \rho^{2t-1} \\ & \quad + \frac{1}{T^{3/2+3\eta/2}} \frac{1}{(1 - \varrho^2)(1 - \varrho\rho)} \sum_{t=2}^{T-1} \sigma_{uv}^2 \left( \frac{t}{T} \right) \sigma_u^2 \left( \frac{t}{T} \right) \sigma_v^2 \left( \frac{t}{T} \right) \varrho^{T+t-1} \rho^{T-t} \\ & \quad - \frac{1}{T^{3/2+3\eta/2}} \frac{\varrho}{(1 - \varrho^2)(1 - \varrho\rho)} \sum_{t=2}^{T-1} \sigma_{uv}^2 \left( \frac{t}{T} \right) \sigma_u^2 \left( \frac{t}{T} \right) \sigma_v^2 \left( \frac{t}{T} \right) \varrho^{T-t} \rho^{T-t} \\ & = \frac{1}{T^{3/2+3\eta/2}} \frac{\varrho}{(1 - \varrho^2)(1 - \varrho\rho)} \sum_{t=2}^{T-1} \sigma_{uv}^2 \left( \frac{t}{T} \right) \sigma_u^2 \left( \frac{t}{T} \right) \sigma_v^2 \left( \frac{t}{T} \right) + R_1^{(\alpha_5)} + R_2^{(\alpha_5)} + R_3^{(\alpha_5)}, \end{aligned}$$

for which again one can elementarily show that  $R_1^{(\alpha_5)}$ ,  $R_2^{(\alpha_5)}$  and  $R_3^{(\alpha_5)}$  are  $o(1)$  and since  $\frac{\varrho}{(1-\varrho^2)(1-\varrho\rho)} = O(T^{2\eta})$ , we have

$$\frac{T^{1/2-\eta/2}}{T^{3/2+3\eta/2}} \frac{\varrho}{(1 - \varrho^2)(1 - \rho^2)} \sum_{t=2}^{T-1} \sigma_{uv}^2 \left( \frac{t}{T} \right) \sigma_u^2 \left( \frac{t}{T} \right) \sigma_v^2 \left( \frac{t}{T} \right) \rightarrow \frac{1}{a^2} \int_0^1 \sigma_{uv}(x) \sigma_u^2(x) \sigma_v^2(x) dx.$$

Now as  $\frac{1-\rho}{1-\varrho} = O(T^{\eta-1})$  we obtain

$$T^{1/2-\eta/2} S_{0,2}^{(\alpha_5)} = O(T^{\eta-1}). \quad (\text{S.5})$$

Putting (S.2)-(S.5) together we obtain

$$T^{1/2-\eta/2} E(S_{0,2}) \rightarrow \frac{1}{4a^2} \int_0^1 \sigma_{uv}(x) \sigma_u^2(x) \sigma_v^2(x) dx.$$

We may now turn to  $S_{0,1}$ . Assuming Lipschitz continuity for the third moments we have

$$\begin{aligned} S_{0,1} &= \sum_{t=2}^T \sum_{j=1}^{t-1} \sum_{k=1}^{t-1} \sum_{l=1}^{t-1} c_{j,t-1} c_{k,t-1} c_{l,t-1} \mathbf{E}(v_j v_k v_l) \mathbf{E}(u_t^3) \\ &= \sum_{t=2}^T \sum_{j=1}^{t-1} c_{j,t-1}^3 \mathbf{E}(v_j^3) \mathbf{E}(u_t^3). \end{aligned}$$

Now again as for the analysis of  $S_{0,2}$  we have to look at all the terms stemming from the expansion of  $c_{j,t-1}^3$ . We start by considering the effect of the first term, namely  $\varrho^{3t-3j}$ .

$$\begin{aligned} & \sum_{t=2}^T \sum_{j=1}^{t-1} \varrho^{3t-3j} \mathbf{E}(v_j^3) \mathbf{E}(u_t^3) \\ &= \sum_{t=2}^T \sigma_u^3\left(\frac{t}{T}\right) \sum_{j=1}^{t-1} \varrho^{3t-3j} \sigma_v^3\left(\frac{j}{T}\right) \\ &= \sum_{t=2}^T \sigma_u^3\left(\frac{t}{T}\right) \sum_{j=1}^{t-1} \varrho^{3t-3j} \left( \sigma_v^3\left(\frac{j}{T}\right) - \sigma_v^3\left(\frac{t}{T}\right) + \sigma_v^3\left(\frac{t}{T}\right) \right) \\ &= \sum_{t=2}^T \sigma_u^3\left(\frac{t}{T}\right) \sum_{j=1}^{t-1} \varrho^{3t-3j} \left( \sigma_v^3\left(\frac{j}{T}\right) - \sigma_v^3\left(\frac{t}{T}\right) \right) + \sum_{t=2}^T \sigma_u^3\left(\frac{t}{T}\right) \sum_{j=1}^{t-1} \varrho^{3t-3j} \sigma_v^3\left(\frac{t}{T}\right) \end{aligned}$$

which implies that

$$\begin{aligned} & \left| \sum_{t=2}^T \sum_{j=1}^{t-1} \varrho^{3t-3j} \mathbf{E}(v_j^3) \mathbf{E}(u_t^3) - \sum_{t=2}^T \sigma_u^3\left(\frac{t}{T}\right) \sigma_v^3\left(\frac{t}{T}\right) \sum_{j=1}^{t-1} \varrho^{3t-3j} \right| \\ & \leq \sum_{t=2}^T \sigma_u^3\left(\frac{t}{T}\right) \sum_{j=1}^{t-1} \varrho^{3t-3j} \left| \sigma_v^3\left(\frac{j}{T}\right) - \sigma_v^3\left(\frac{t}{T}\right) \right| \\ & \leq \frac{C}{T} \sum_{t=2}^T \sum_{j=1}^{t-1} \varrho^{3t-3j} (t-j) = O(T^{3\eta}) \end{aligned}$$

On the other hand  $\sum_{j=1}^{t-1} \varrho^{3t-3j} = \frac{\varrho^3 - \varrho^{3t}}{1 - \varrho^3}$ , hence

$$\begin{aligned} & T^{1/2-\eta/2} \times \frac{1}{T^{1/2+\eta/2}} \frac{1}{T^{1+\eta}} \sum_{t=2}^T \sum_{j=1}^{t-1} \varrho^{3t-3j} \mathbf{E}(v_j^3) \mathbf{E}(u_t^3) \\ &= T^{-2\eta} \frac{1}{T} \sum_{t=2}^T \sigma_u^3\left(\frac{t}{T}\right) \sigma_v^3\left(\frac{t}{T}\right) \sum_{j=1}^{t-1} \varrho^{3t-3j} + O(T^{\eta-1}) \\ &= T^{-2\eta} \frac{1}{T} \sum_{t=2}^T \sigma_u^3\left(\frac{t}{T}\right) \sigma_v^3\left(\frac{t}{T}\right) \frac{\varrho^3 - \varrho^{3t}}{1 - \varrho^3} + O(T^{\eta-1}) \end{aligned}$$

$$= \frac{\varrho^3}{1-\varrho^3} T^{-2\eta} \frac{1}{T} \sum_{t=2}^T \sigma_u^3 \left( \frac{t}{T} \right) \sigma_v^3 \left( \frac{t}{T} \right) - \frac{1}{1-\varrho^3} T^{-2\eta} \frac{1}{T} \sum_{t=2}^T \sigma_u^3 \left( \frac{t}{T} \right) \sigma_v^3 \left( \frac{t}{T} \right) \varrho^{3t} + O(T^{\eta-1})$$

First note that  $\frac{\varrho^3}{1-\varrho^3} T^{-2\eta} \frac{1}{T} \sum_{t=2}^T \sigma_u^3 \left( \frac{t}{T} \right) \sigma_v^3 \left( \frac{t}{T} \right) = O(T^{-\eta})$ . Further

$$\left| \sum_{t=2}^T \sigma_u^3 \left( \frac{t}{T} \right) \sigma_v^3 \left( \frac{t}{T} \right) \varrho^{3t} \right| \leq C \left| \sum_{t=2}^T \varrho^{3t} \right| = O(T^\eta).$$

Therefore  $T^{1/2-\eta/2} \times \frac{1}{T^{1/2+\eta/2}} \frac{1}{T^{1+\eta}} \sum_{t=2}^T \sum_{j=1}^{t-1} \varrho^{3t-3j} \mathbb{E} \left( v_j^3 \right) \mathbb{E} \left( u_t^3 \right) = o(1)$ . The other terms stemming from expanding  $c_{j,t-1}^3$  can be shown, in a similar way, to vanish.

## Proof of Proposition 2

We prove first that, the null  $\beta = 0$ , the following holds:

$$t_{vx}^{rec} = \frac{\sum_{t=2}^T \left( \tilde{z}_{t-1} - \frac{1}{t-1} \sum_{j=1}^{t-1} \tilde{z}_j \right) \left( u_t - \frac{\sum_{j=t}^T u_j}{T-t+1} \right)}{\sqrt{\sum_{t=2}^T \left( \tilde{z}_{t-1} - \frac{1}{t-1} \sum_{j=1}^{t-1} \tilde{z}_j \right)^2 u_t^2}} + O_p(T^{-\eta/2}),$$

where  $\tilde{z}_{t-1} = (1 - \varrho L)_+^{-1} \Delta \tilde{x}_{t-1}$  with  $\tilde{x}_t = \sum_{j=0}^{t-2} \varrho^j \nu_{t-1-j}$ .

Using arguments like those given in the proof of Lemma 2, we conclude that

$$\frac{\sum_{t=2}^T \left( z_{t-1} - \frac{1}{t-1} \sum_{j=1}^{t-1} z_j \right) \left( u_t - \frac{\sum_{j=t}^T u_j}{T-t+1} \right)}{\sqrt{\sum_{t=2}^T \left( z_{t-1} - \frac{1}{t-1} \sum_{j=1}^{t-1} z_j \right)^2 \hat{u}_t^2}} = \frac{\sum_{t=2}^T \left( z_{t-1} - \frac{1}{t-1} \sum_{j=1}^{t-1} z_j \right) \left( u_t - \frac{\sum_{j=t}^T u_j}{T-t+1} \right)}{\sqrt{\sum_{t=2}^T \left( z_{t-1} - \frac{1}{t-1} \sum_{j=1}^{t-1} z_j \right)^2 u_t^2}} + O_p(T^{-1/2}).$$

Using  $z_{t-1} = \psi \tilde{z}_{t-1} + r_{t-1}$  from Lemma 2, we have that

$$\begin{aligned} & \frac{1}{T^{1+\eta}} \sum_{t=2}^T \left( z_{t-1} - \frac{1}{t-1} \sum_{j=1}^{t-1} z_j \right)^2 u_t^2 = \\ &= \frac{1}{T^{1+\eta}} \sum_{t=2}^T \left( \psi \tilde{z}_{t-1} + r_{t-1} - \frac{1}{t-1} \sum_{j=1}^{t-1} (\psi \tilde{z}_j + r_j) \right)^2 u_t^2 \\ &= \frac{\psi^2}{T^{1+\eta}} \sum_{t=2}^T \left( \tilde{z}_{t-1} - \frac{1}{t-1} \sum_{j=1}^{t-1} \tilde{z}_j \right)^2 u_t^2 + \frac{1}{T^{1+\eta}} \sum_{t=2}^T \left( r_{t-1} - \frac{1}{t-1} \sum_{j=1}^{t-1} r_j \right)^2 u_t^2 \\ & \quad + \frac{2\psi}{T^{1+\eta}} \sum_{t=2}^T \left( \tilde{z}_{t-1} - \frac{1}{t-1} \sum_{j=1}^{t-1} \tilde{z}_j \right) \left( r_{t-1} - \frac{1}{t-1} \sum_{j=1}^{t-1} r_j \right) u_t^2. \\ &= \frac{\psi^2}{T^{1+\eta}} \sum_{t=2}^T \left( \tilde{z}_{t-1} - \frac{1}{t-1} \sum_{j=1}^{t-1} \tilde{z}_j \right)^2 u_t^2 + A_{1T} + A_{2T}. \end{aligned}$$

Examine  $A_{1T}$  first,

$$A_{1T} = \frac{1}{T^{1+\eta}} \sum_{t=2}^T r_{t-1}^2 u_t^2 + \frac{1}{T^{1+\eta}} \sum_{t=2}^T \left( \frac{1}{t-1} \sum_{j=1}^{t-1} r_j \right)^2 u_t^2 - \frac{2}{T^{1+\eta}} \sum_{t=2}^T \frac{r_{t-1}}{t-1} \sum_{j=1}^{t-1} r_j u_t^2.$$

Thanks to the independence of  $r_{t-1}$  and  $u_t$  and since  $r_t$  is uniformly  $L_4$ -bounded, we have

$$\mathbb{E} \left( \left| \frac{1}{T^{1+\eta}} \sum_{t=2}^T r_{t-1}^2 u_t^2 \right| \right) \leq \frac{C}{T^{1+\eta}} \sum_{t=2}^T \sqrt{\mathbb{E}(r_{t-1}^4)} \mathbb{E}(u_t^2) = O(T^{-\eta}).$$

For the second term of  $A_{1T}$ , note that

$$\begin{aligned} \mathbb{E} \left( \frac{1}{T^{1+\eta}} \sum_{t=2}^T \left( \frac{1}{t-1} \sum_{j=1}^{t-1} r_j \right)^2 u_t^2 \right) &= \frac{\sigma_u^2}{T^{1+\eta}} \sum_{t=2}^T \frac{1}{(t-1)^2} \mathbb{E} \left( \left( \sum_{j=1}^{t-1} r_j \right)^2 \right) \\ &\leq \frac{C}{T^\eta}, \end{aligned}$$

while, for the last term, we have

$$\begin{aligned} \frac{2}{T^{1+\eta}} \mathbb{E} \left( \left| \sum_{t=2}^T \frac{r_{t-1}}{t-1} \sum_{j=1}^{t-1} r_j u_t^2 \right| \right) &\leq \frac{2\sigma_u^2}{T^{1+\eta}} \sum_{t=2}^T \frac{1}{t-1} \sqrt{\mathbb{E}(r_{t-1}^2)} \sqrt{\mathbb{E} \left( \left( \sum_{j=1}^{t-1} r_j \right)^2 \right)} \\ &= O(T^{-\eta}). \end{aligned}$$

Moving on to  $A_{2T}$ , write

$$\begin{aligned} \mathbb{E}(|A_{2T}|) &\leq \frac{2\psi}{T^{1+\eta}} \mathbb{E} \left( \left| \sum_{t=2}^T \tilde{z}_{t-1} r_{t-1} u_t^2 \right| \right) + \frac{2\psi}{T^{1+\eta}} \mathbb{E} \left( \left| \sum_{t=2}^T \frac{\tilde{z}_{t-1} u_t^2}{t-1} \sum_{j=1}^{t-1} r_j \right| \right) \\ &\quad + \frac{2\psi}{T^{1+\eta}} \mathbb{E} \left( \left| \sum_{t=2}^T \frac{r_{t-1} u_t^2}{t-1} \sum_{j=1}^{t-1} \tilde{z}_j \right| \right) + \frac{2\psi}{T^{1+\eta}} \mathbb{E} \left( \left| \sum_{t=2}^T \frac{1}{(t-1)^2} \sum_{j=1}^{t-1} \tilde{z}_j \sum_{j=1}^{t-1} r_j u_t^2 \right| \right) \\ &\leq \frac{2\psi}{T^{1+\eta}} \sum_{t=2}^T \sqrt{\mathbb{E}(\tilde{z}_{t-1}^2) \mathbb{E}(r_{t-1}^2) \mathbb{E}(u_t^2)} + \frac{2\psi}{T^{1+\eta}} \sum_{t=2}^T \sqrt{\mathbb{E}(\tilde{z}_{t-1}^2) \mathbb{E}(u_t^4)} \sqrt{\frac{\mathbb{E} \left( \left( \sum_{j=1}^{t-1} r_j \right)^2 \right)}{(t-1)^2}} \\ &\quad + \frac{2\psi}{T^{1+\eta}} \sum_{t=2}^T \sqrt{\mathbb{E}(r_{t-1}^2) \mathbb{E}(u_t^4)} \sqrt{\frac{\mathbb{E} \left( \left( \sum_{j=1}^{t-1} \tilde{z}_j \right)^2 \right)}{(t-1)^2}} \\ &\quad + \frac{2\psi}{T^{1+\eta}} \sum_{t=2}^T \sqrt{\frac{\mathbb{E} \left( \left( \sum_{j=1}^{t-1} \tilde{z}_j \right)^2 \right) \mathbb{E} \left( \left( \sum_{j=1}^{t-1} r_j \right)^2 \right)}{(t-1)^2} \mathbb{E}(u_t^4)} \\ &= O(T^{-\eta/2}) \end{aligned}$$

where we have everywhere used the  $L_4$  boundedness and also  $\text{Var} \left( \sum_{j=1}^{t-1} \tilde{z}_j \right) \leq CtT^{2\eta}$  which can

easily be established using the expansion for  $\tilde{z}_{t-1}$  given in the proof of Proposition 1. Therefore

$$\frac{1}{T^{1+\eta}} \sum_{t=2}^T \left( z_{t-1} - \frac{1}{t-1} \sum_{j=1}^{t-1} z_j \right)^2 u_t^2 = \frac{\psi^2}{T^{1+\eta}} \sum_{t=2}^T \left( \tilde{z}_{t-1} - \frac{1}{t-1} \sum_{j=1}^{t-1} \tilde{z}_j \right)^2 u_t^2 + O_p \left( T^{-\eta/2} \right). \quad (\text{S.6})$$

Furthermore

$$\begin{aligned} & \frac{1}{T^{1/2+\eta/2}} \sum_{t=2}^T \left( z_{t-1} - \frac{1}{t-1} \sum_{j=1}^{t-1} z_j \right) \left( u_t - \frac{\sum_{j=t}^T u_j}{T-t+1} \right) \\ &= \frac{1}{T^{1/2+\eta/2}} \sum_{t=2}^T \left( \psi \tilde{z}_{t-1} + r_{t-1} - \frac{1}{t-1} \sum_{j=1}^{t-1} (\psi \tilde{z}_j + r_j) \right) \left( u_t - \frac{\sum_{j=t}^T u_j}{T-t+1} \right) \\ &= \frac{1}{T^{1/2+\eta/2}} \psi \sum_{t=2}^T \left( \tilde{z}_{t-1} - \frac{1}{t-1} \sum_{j=1}^{t-1} \tilde{z}_j \right) \left( u_t - \frac{\sum_{j=t}^T u_j}{T-t+1} \right) \\ & \quad + \frac{1}{T^{1/2+\eta/2}} \sum_{t=2}^T \left( r_{t-1} - \frac{1}{t-1} \sum_{j=1}^{t-1} r_j \right) \left( u_t - \frac{\sum_{j=t}^T u_j}{T-t+1} \right). \end{aligned}$$

We now re-arrange the sum terms to exploit the serial independence of  $u_t$ , leading after some algebra exploiting the  $L_r$  boundedness of  $r_t$  to

$$\text{Var} \left( \frac{1}{T^{1/2+\eta/2}} \sum_{t=2}^T \left( r_{t-1} - \frac{1}{t-1} \sum_{j=1}^{t-1} r_j \right) \left( u_t - \frac{\sum_{j=t}^T u_j}{T-t+1} \right) \right) = O \left( T^{-\eta} \right)$$

and therefore

$$\begin{aligned} & \frac{1}{T^{1/2+\eta/2}} \sum_{t=2}^T \left( z_{t-1} - \frac{1}{t-1} \sum_{j=1}^{t-1} z_j \right) \left( u_t - \frac{\sum_{j=t}^T u_j}{T-t+1} \right) \\ &= \frac{1}{T^{1/2+\eta/2}} \psi \sum_{t=2}^T \left( \tilde{z}_{t-1} - \frac{1}{t-1} \sum_{j=1}^{t-1} \tilde{z}_j \right) \left( u_t - \frac{\sum_{j=t}^T u_j}{T-t+1} \right) + O_p \left( T^{-\eta/2} \right). \quad (\text{S.7}) \end{aligned}$$

The desired representation follows from equations (S.6) and (S.7).

Write now

$$\begin{aligned} & \frac{\sum_{t=2}^T \left( \tilde{z}_{t-1} - \frac{1}{t-1} \sum_{j=1}^{t-1} \tilde{z}_j \right) \left( u_t - \frac{\sum_{j=t}^T u_j}{T-t+1} \right)}{\sqrt{\sum_{t=2}^T \left( \tilde{z}_{t-1} - \frac{1}{t-1} \sum_{j=1}^{t-1} \tilde{z}_j \right)^2 u_t^2}} = \frac{\sum_{t=2}^T \tilde{z}_{t-1} u_t}{\sqrt{D_T}} - \frac{\sum_{t=2}^T \frac{1}{T-t+1} \tilde{z}_{t-1} \sum_{j=t}^T u_j}{\sqrt{D_T}} \\ & \quad - \frac{\sum_{t=2}^T \frac{1}{t-1} u_t \sum_{j=1}^{t-1} \tilde{z}_j}{\sqrt{D_T}} + \frac{\sum_{t=2}^T \frac{1}{t-1} \sum_{j=1}^{t-1} \tilde{z}_j \frac{1}{T-t+1} \sum_{j=t}^T u_j}{\sqrt{D_T}} \\ &= \frac{\sum_{t=2}^T \tilde{z}_{t-1} u_t}{\sqrt{D_T}} + \frac{C_{1,T}}{\sqrt{D_T}} + \frac{C_{2,T}}{\sqrt{D_T}} + \frac{C_{3,T}}{\sqrt{D_T}}. \end{aligned}$$

First we look at the variance of  $C_{1,T} = \sum_{t=2}^T \frac{1}{T-t+1} \tilde{z}_{t-1} \sum_{j=t}^T u_j$ :

$$\begin{aligned} \text{Var}(C_{1,T}) &= \text{Var} \left( \sum_{j=2}^T u_j \sum_{t=2}^j \frac{\tilde{z}_{t-1}}{T-t+1} \right) \\ &\leq \max_{s \in [0,1]} \sigma_u^2(s) \sum_{j=2}^T \text{Var} \left( \sum_{t=2}^j \frac{\tilde{z}_{t-1}}{T-t+1} \right) \\ &= \max_{s \in [0,1]} \sigma_u^2(s) \sum_{j=2}^T \text{Var} \left( \sum_{t=2}^j \sum_{k=1}^{t-1} \frac{c_{k,t-1}}{T-t+1} \nu_k \right) \end{aligned}$$

with  $c_{k,t}$  from the proof of Proposition 1. Hence

$$\begin{aligned} \text{Var}(C_{1,T}) &\leq \max_{s \in [0,1]} \sigma_u^2(s) \sum_{j=2}^T \text{Var} \left( \sum_{k=1}^{j-1} \nu_k \sum_{t=k+1}^j \frac{c_{k,t-1}}{T-t+1} \right) \\ &= \max_{s \in [0,1]} \sigma_u^2(s) \max_{s \in [0,1]} \sigma_\nu^2(s) \sum_{j=2}^T \sum_{k=1}^{j-1} \left( \sum_{t=k+1}^j \frac{c_{k,t-1}}{T-t+1} \right)^2 \\ &= O \left( \left( \frac{1-\varrho}{\rho-\varrho} \right)^2 \sum_{j=2}^T \sum_{k=1}^{j-1} \left( \sum_{t=k+1}^j \frac{\varrho^{t-1-k}}{T-t+1} \right)^2 \right). \end{aligned}$$

With

$$\begin{aligned} \sum_{j=2}^T \sum_{k=1}^{j-1} \left( \sum_{t=k+1}^j \frac{\varrho^{t-1-k}}{T-t+1} \right)^2 &\leq \sum_{j=2}^T \sum_{k=1}^{j-1} \left( \sum_{t=1}^T \frac{\varrho^{t-1-k}}{T-t+1} \right)^2 \\ &= \sum_{j=2}^T \sum_{k=1}^{j-1} \varrho^{-k} \left( \sum_{t=1}^T \frac{\varrho^{t-1}}{T-t+1} \right)^2 \\ &= \sum_{j=2}^T \sum_{k=1}^{j-1} \varrho^{-k} \left( \varrho^T \sum_{t=1}^{T-1} \frac{\varrho^{-t}}{t} + \frac{1}{T} \right)^2 \\ &= \sum_{j=2}^T \sum_{k=1}^{j-1} \varrho^{-k} \left( \varrho^T \frac{1}{T} \sum_{t=1}^{T-1} \frac{(\varrho^T)^{-t/T}}{t/T} + \frac{1}{T} \right)^2 \\ &= \sum_{j=2}^T \sum_{k=1}^{j-1} \varrho^{-k} \left( \varrho^T O \left( \int_{1/T}^{1-1/T} \frac{(\varrho^{-T})^x}{x} \right) + \frac{1}{T} \right)^2, \end{aligned}$$

and, with  $\text{Ei}(x) = \int_x^\infty \frac{\exp(-z)}{z} dz$ ,

$$\begin{aligned} \int_{1/T}^{1-1/T} \frac{(\varrho^{-T})^x}{x} dx &= \text{Ei} \left( \left( 1 - \frac{1}{T} \right) \log(\varrho^{-T}) \right) - \text{Ei} \left( \frac{1}{T} \log(\varrho^{-T}) \right) \\ &= O(\log T), \end{aligned}$$

leading to

$$\begin{aligned}
& \sum_{j=2}^T \sum_{k=1}^{j-1} \varrho^{-k} \left( \varrho^T O \left( \int_{1/T}^{1-1/T} \frac{(\varrho^{-T})^x}{x} \right) + \frac{1}{T} \right)^2 \\
&= O(\log^2 T) \sum_{j=2}^T \sum_{k=1}^{j-1} \varrho^{2T-k} \\
&= O(\log^2 T) \sum_{j=2}^T \frac{\varrho^{2T} - \varrho^{2T-j+1}}{\varrho - 1} \\
&= O(\log^2 T) \left( \frac{(T-1)\varrho^{2T}}{\varrho - 1} + \frac{\varrho}{\varrho - 1} \frac{\varrho^{2T-1} - \varrho^T}{\varrho - 1} \right) \\
&= O\left(T e^{-aT^{1-\eta}} \log^2 T\right),
\end{aligned}$$

which in turn implies that

$$T^{-1/2-\eta} C_{1,T} = o(1).$$

Now we turn to the variance of  $C_{2,T} = \sum_{t=2}^T \frac{1}{t-1} u_t \sum_{j=1}^{t-1} \tilde{z}_j$ :

$$\begin{aligned}
\text{Var}(C_{2,T}) &= \sum_{t=2}^T \text{Var} \left( \sum_{j=1}^{t-1} \frac{1}{t-1} u_t \tilde{z}_j \right) \\
&\leq \max_{s \in [0,1]} \sigma_u^2(s) \sum_{t=2}^T \frac{1}{(t-1)^2} \mathbb{E} \left[ \left( \sum_{j=1}^{t-1} \sum_{k=1}^j c_{k,j} \nu_k \right)^2 \right] \\
&\leq \max_{s \in [0,1]} \sigma_u^2(s) \max_{s \in [0,1]} \sigma_\nu^2(s) \sum_{t=2}^T \frac{1}{(t-1)^2} \sum_{k=1}^{t-1} \left( \sum_{j=k}^{t-1} c_{k,j} \right)^2
\end{aligned}$$

like above. Since  $\sum_{j=k}^{t-1} c_{k,j} = \frac{\rho^{t-k} - \varrho^{t-k}}{\rho - \varrho}$ , we obtain

$$\begin{aligned}
\sum_{k=1}^{t-1} \left( \sum_{j=k}^{t-1} c_{k,j} \right)^2 &= \sum_{k=1}^{t-1} \left( \frac{\rho^{t-k} - \varrho^{t-k}}{\rho - \varrho} \right)^2 \\
&= \frac{1}{(\rho - \varrho)^2} \sum_{k=1}^{t-1} \left( \rho^{2t-2k} + \varrho^{2t-2k} - 2(\rho\varrho)^{t-k} \right) \\
&= \frac{1}{(\rho - \varrho)^2} \left( \frac{\rho^2 - \rho^{2t}}{1 - \rho^2} + \frac{\varrho^2 - \varrho^{2t}}{1 - \varrho^2} - 2 \frac{(\varrho\rho)^2 - (\rho\varrho)^{2t}}{1 - (\rho\varrho)^2} \right).
\end{aligned}$$

Therefore

$$\begin{aligned}
\sum_{t=2}^T \frac{1}{(t-1)^2} \frac{\rho^{2-2t}}{(\rho - \varrho)^2} &= \frac{\rho^2}{(\rho - \varrho)^2} \frac{1}{T^2} \sum_{t=1}^{T-1} \frac{(\rho^{-2T})^{t/T}}{(t/T)^2} \\
&= O\left(T^{2\eta-1} \int_{1/T}^{1-1/T} \frac{(\rho^{-2T})^x}{x^2} dx\right) \\
&= O(T^{2\eta}),
\end{aligned}$$

where

$$\begin{aligned}
\int_{1/T}^{1-1/T} \frac{(\rho^{-2T})^x}{x^2} dx &= \log(\rho^{-2T}) \operatorname{Ei}(x \log(\rho^{-2T})) - \frac{\rho^{-2Tx}}{x} \Big|_{1/T}^{1-1/T} \\
&= \log(\rho^{-2T}) \operatorname{Ei}\left(\left(1 - \frac{1}{T}\right) \log(\rho^{-2T})\right) - \frac{T\rho^{-2(T-1)}}{T-1} \\
&\quad - \log(\rho^{-2T}) \operatorname{Ei}\left(\frac{1}{T} \log(\rho^{-2T})\right) - T\rho^{-2} \\
&= O(T).
\end{aligned}$$

Also we have that

$$\begin{aligned}
\int_{1/T}^{1-1/T} \frac{(\varrho^{-2T})^x}{x^2} dx &= \log(\varrho^{-2T}) \operatorname{Ei}\left(\left(1 - \frac{1}{T}\right) \log(\varrho^{-2T})\right) - \frac{T\varrho^{-2(T-1)}}{T-1} \\
&\quad - \log(\varrho^{-2T}) \operatorname{Ei}\left(\frac{1}{T} \log(\varrho^{-2T})\right) - T\varrho^{-2} \\
&= O(T)
\end{aligned}$$

The other term is of the same order, implying that

$$T^{-\eta-1/2} C_{2,T} = O_p(T^{-1/2}).$$

Finally, we look at the variance of  $C_{3,T} = \sum_{t=2}^T \frac{1}{t-1} \sum_{j=1}^{t-1} \tilde{z}_j \frac{1}{T-t+1} \sum_{j=t}^T u_j$ :

$$\operatorname{Var}(C_{3,T}) \leq \max_{s \in [0,1]} \sigma_u^2(s) \max_{s \in [0,1]} \sigma_v^2(s) \sum_{t=2}^T \frac{1}{(t-1)^2} \operatorname{E} \left[ \left( \sum_{j=1}^{t-1} \tilde{z}_j \right)^2 \right],$$

which can be treated as  $C_{2,T}$ , leading to

$$T^{-\eta-1/2} C_{3,T} = O_p(T^{-1/2}).$$

For  $D_T$ , appearing in the denominator we have

$$\begin{aligned}
T^{-\eta-1} D_T &= T^{-\eta-1} \sum_{t=2}^T \left( \tilde{z}_{t-1} - \frac{1}{t-1} \sum_{j=1}^{t-1} \tilde{z}_j \right)^2 (u_t^2 - \sigma_u^2(t/T)) \\
&\quad + T^{-\eta-1} \sum_{t=2}^T \left( \tilde{z}_{t-1} - \frac{1}{t-1} \sum_{j=1}^{t-1} \tilde{z}_j \right)^2 \sigma_u^2(t/T) \\
&= D_{1,T} + D_{2,T}
\end{aligned}$$

Examine

$$D_{2,T} = T^{-\eta-1} \sum_{t=2}^T \left( \tilde{z}_{t-1} - \frac{1}{t-1} \sum_{j=1}^{t-1} \tilde{z}_j \right)^2 \sigma_u^2\left(\frac{t}{T}\right)$$



$$= \frac{1}{T^{1+\eta}} \sum_{t=2}^T \tilde{z}_{t-1}^2 \sigma_u^2 \left( \frac{t}{T} \right) + \frac{1}{T^{1+\eta}} \sum_{t=2}^T \left( \frac{1}{t-1} \sum_{j=1}^{t-1} \tilde{z}_j \right)^2 \sigma_u^2 \left( \frac{t}{T} \right) - \frac{2}{T^{1+\eta}} \sum_{t=2}^T \frac{\tilde{z}_{t-1}}{t-1} \sum_{j=1}^{t-1} \tilde{z}_j \sigma_u^2 \left( \frac{t}{T} \right).$$

It is not difficult to show (using for example arguments analogous to the derivations for  $C_{1,T}$ ) that, for all  $2 \leq t \leq T$  and a suitable constant  $C$ ,  $\text{Var} \left( \sum_{j=1}^{t-1} \tilde{z}_j \right) \leq CtT^{2\eta}$ . Therefore,

$$\mathbb{E} \left( \left| T^{-\eta-1} \sum_{t=2}^T \left( \frac{1}{t-1} \sum_{j=1}^{t-1} \tilde{z}_j \right)^2 \sigma_u^2 \left( \frac{t}{T} \right) \right| \right) \leq \frac{C}{T^{\eta+1}} \sum_{t=2}^T \text{Var} \left( \frac{1}{t-1} \sum_{j=1}^{t-1} \tilde{z}_j \right) \leq \frac{C}{T^{1-\eta}} \sum_{t=2}^T \frac{1}{t-1}$$

and, thanks to Markov's inequality,

$$T^{-\eta-1} \sum_{t=2}^T \left( \frac{1}{t-1} \sum_{j=1}^{t-1} \tilde{z}_j \right)^2 \sigma_u^2 \left( \frac{t}{T} \right) = O_p(T^{\eta-1} \log T).$$

Moreover, recall that  $T^{-\eta/2} \tilde{z}_{t-1}$  is uniformly  $L_4$ -bounded, hence, with the Cauchy-Schwarz inequality, we have that

$$\mathbb{E} \left( \left| \frac{\tilde{z}_{t-1}}{t-1} \sum_{j=1}^{t-1} \tilde{z}_j \right| \right) \leq \frac{CT^{\eta/2}}{t-1} \sqrt{\mathbb{E} \left( \left( \sum_{j=1}^{t-1} \tilde{z}_j \right)^2 \right)} \leq \frac{CT^{3\eta/2}}{\sqrt{t}}$$

and

$$\mathbb{E} \left( \left| T^{-\eta-1} \sum_{t=2}^T \frac{\tilde{z}_{t-1}}{t-1} \sum_{j=1}^{t-1} \tilde{z}_j \sigma_u^2 \left( \frac{t}{T} \right) \right| \right) \leq \frac{CT^{3\eta/2}}{T^{\eta+1}} \sum_{t=2}^T \frac{1}{\sqrt{t}} = CT^{\eta/2-1/2}.$$

Furthermore, it is not difficult to show that  $D_{1,T} \xrightarrow{p} 0$  thanks to the md property of the summands. We thus have that

$$T^{-\eta-1} D_T \xrightarrow{p} \frac{1}{2a} \int_0^1 \sigma_u^2(s) \sigma_\nu^2(s) ds$$

and consequently

$$\frac{C_{1,T}}{\sqrt{D_T}} + \frac{C_{2,T}}{\sqrt{D_T}} + \frac{C_{3,T}}{\sqrt{D_T}} = O_p(T^{-1/2}).$$

We are now left to consider the asymptotic behavior of  $\frac{\sum_{t=2}^T \tilde{z}_{t-1} u_t}{\sqrt{D_T}}$ . To do so we follow the proof of Proposition 1 and write

$$\frac{T^{-1/2-\eta/2} \sum_{t=2}^T \tilde{z}_{t-1} u_t}{\sqrt{T^{-1-\eta} \sum_{t=2}^T \left( \tilde{z}_{t-1} - \frac{1}{t-1} \sum_{j=1}^{t-1} \tilde{z}_j \right)^2 u_t^2}} = Z_T + B_T + R_T$$

where  $Z_T$  and  $B_T$  are the same as equations (8) and (9) which have been treated in the proof of Proposition 1, and

$$R_T = \frac{3}{4} \frac{T^{-1/2-\eta/2} \sum_{t=2}^T \tilde{z}_{t-1} u_t}{\sqrt{\xi_T^5}} \left( T^{-1-\eta} \sum_{t=2}^T \left( \tilde{z}_{t-1} - \frac{1}{t-1} \sum_{j=1}^{t-1} \tilde{z}_j \right)^2 u_t^2 - \frac{1}{2a} \int_0^1 \sigma_u^2(s) \sigma_\nu^2(s) ds \right)^2$$

$$-\frac{T^{-1/2-\eta/2} \sum_{t=2}^T \tilde{z}_{t-1} u_t}{2\sqrt{\left(\frac{1}{2a} \int_0^1 \sigma_u^2(s) \sigma_v^2(s) ds\right)^3}} \frac{1}{T^{1+\eta}} \sum_{t=2}^T \left( \left( \frac{1}{t-1} \sum_{j=1}^{t-1} \tilde{z}_j \right)^2 u_t^2 - \frac{2u_t^2 \tilde{z}_{t-1}}{t-1} \sum_{j=1}^{t-1} \tilde{z}_j \right)$$

with  $\xi_T$  between  $\frac{1}{2a} \int_0^1 \sigma_u^2(s) \sigma_v^2(s) ds$  and  $T^{-1-\eta} \sum_{t=2}^T \left( \tilde{z}_{t-1} - \frac{1}{t-1} \sum_{j=1}^{t-1} \tilde{z}_j \right)^2 u_t^2$ , i.e.  $\xi_T = O_p(1)$ .

The term  $B_T$  vanishes due to the component  $\left( T^{-1-\eta} \sum_{t=2}^T \left( \tilde{z}_{t-1} - \frac{1}{t-1} \sum_{j=1}^{t-1} \tilde{z}_j \right)^2 u_t^2 - \frac{1}{2a} \int_0^1 \sigma_u^2(s) \sigma_v^2(s) ds \right)$ , appearing squared in the first summand of  $R_T$  which is therefore, in turn, dominated by  $B_T$ . To analyze the second summand, examine in turn

$$\mathbb{E} \left( \left| \left( \frac{1}{t-1} \sum_{j=1}^{t-1} \tilde{z}_j \right)^2 u_t^2 \right| \right) \leq \frac{CT^{2\eta}}{t-1}$$

thanks to independence of  $\tilde{z}_j$  and  $u_t$  for  $j \leq t-1$ , and, like above,

$$\mathbb{E} \left( \left| \frac{2u_t^2 \tilde{z}_{t-1}}{t-1} \sum_{j=1}^{t-1} \tilde{z}_j \right| \right) \leq \frac{C}{t-1} \mathbb{E} \left( \left| \tilde{z}_{t-1} \sum_{j=1}^{t-1} \tilde{z}_j \right| \right) = \frac{C}{t-1} \sum_{j=1}^{t-1} \mathbb{E} (|\tilde{z}_{t-1} \tilde{z}_j|).$$

Some algebra indicates that

$$\mathbb{E} (|\tilde{z}_{t-1} \tilde{z}_j|) \leq CT^\eta \rho^{t-j-1}$$

such that, summing up,

$$\mathbb{E} \left( \left| \frac{1}{T^{1+\eta}} \sum_{t=2}^T \frac{2u_t^2 \tilde{z}_{t-1}}{t-1} \sum_{j=1}^{t-1} \tilde{z}_j \right| \right) \leq \frac{CT^\eta}{T^{1+\eta}} \sum_{t=2}^T \frac{1}{t-1} \sum_{j=1}^{t-1} \rho^{t-j-1} = \frac{C}{T} \sum_{t=2}^T \frac{1}{t-1} \frac{1-\rho^t}{1-\rho} = O(T^{\eta-1} \log T)$$

as required for  $R_T = o_p(T^{\eta/2-1/2})$ . The result follows from the proof of Proposition 1.

## II A more detailed comparison of $t_{vx}$ and $t_{vx}^W$

The test statistics  $t_{vx}$  and  $t_{vx}^W$  have the same leading terms, but differ with respect to some higher-order ones. Concretely,  $t_{vx}^W$  has the additional term

$$\frac{1}{2} \frac{\frac{1}{T^{1/2+\eta/2}} \sum_{t=2}^T z_{t-1} (u_t - \bar{u})}{\sqrt{\zeta_T}} \left( T^{-\eta} \bar{z}^2 \hat{\omega}_{u|v}^2 \right)$$

with  $\zeta_T = \frac{1}{T^{1+\eta}} \sum_{t=2}^T z_{t-1}^2 \hat{u}_t^2 + o_p(1)$ , but, as can be seen from the proof of Proposition 3, does not exhibit

$$-\frac{1}{2} \frac{1}{\sqrt{\left(\frac{1}{2a} \int_0^1 \sigma_u^2(s) \sigma_v^2(s) ds\right)^3}} \left( \frac{1}{T^{1/2+\eta/2}} \sum_{t=2}^T \tilde{z}_{t-1} u_t \right) \left( \frac{-2\bar{z}}{T^{1+\eta}} \sum_{t=2}^T \tilde{z}_{t-1} u_t^2 + \frac{\bar{z}^2}{T^{1+\eta}} \sum_{t=2}^T u_t^2 \right)$$

and, since  $\xi_T, \xi_T^W = \frac{1}{2a} \int_0^1 \sigma_u^2(s) \sigma_\nu^2(s) ds + o_p(1)$ , it also does not exhibit

$$\frac{3}{4} \frac{1}{\sqrt{\left(\frac{1}{2a} \int_0^1 \sigma_u^2(s) \sigma_\nu^2(s) ds\right)^5}} \left( \frac{1}{T^{1/2+\eta/2}} \sum_{t=2}^T \tilde{z}_{t-1} u_t \right) \left( \frac{-2\bar{z}}{T^{1+\eta}} \sum_{t=2}^T \tilde{z}_{t-1} u_t^2 + \frac{\bar{z}^2}{T^{1+\eta}} \sum_{t=2}^T u_t^2 \right)^2.$$

One may use arguments from the proof of Proposition 3 to show them be of order  $O_p(T^{\eta-1})$  and thus, for  $\eta$  close to unity, they will also matter in finite samples alongside  $B_T$  and  $C_T$  (as suggested by the comparison of Figure 1 with Figure 2 for  $c = 0$ ). An exact derivation of the expectation of the above terms is however beyond the scope of this paper.

### III Further Monte Carlo results

In this section we provide further Monte Carlo results to investigate the effects of conditional heteroskedasticity on the behavior of different testing procedures. In particular, we consider a DGP based on

$$y_t = \mu + \beta x_{t-1} + u_t, \quad t = 2, \dots, T, \quad (\text{S.8})$$

where

$$x_t = \rho x_{t-1} + v_t, \quad (\text{S.9})$$

with  $v_t = \phi v_t + \nu_t$  for  $\phi = 0.5$  and  $u_t = \sigma_t \varepsilon_t$  with  $\sigma_t^2 = \alpha_0 + \alpha_1 \varepsilon_{t-1}^2 + \gamma_1 \sigma_{t-1}^2$ , where  $(\varepsilon_t, \nu_t) \sim iiN(0, \Sigma)$  when the diagonal elements of  $\Sigma$  are identity and the correlation coefficient is  $\delta = -0.95$ . For the GARCH(1,1) specifications we choose  $\alpha_1 = 0.1$  and  $\gamma_1 \in \{0.5, 0.7, 0.8, 0.85, 0.89\}$  with  $\alpha_0 = 1 - \alpha_1 - \gamma_1$ . Further, we set  $\rho = 1 - c/T$  for various  $c \in \{0, 1, 5, 10, 30, 50\}$  and  $\varrho = 1 - 1/T^{0.95}$  and use standard normal critical values. Finally, we consider  $T = 250$  and  $500$  with  $10^4$  replications for the Monte Carlo. Table S.1 shows the MC results which speak of a good size control when using the t-ratios proposed in this paper:  $t_{vx}^{rec}$  or  $t_{vx}^*$ . While the size figures for the two-sided versions are generally very close to the nominal value of 5% for all the three test statistics considered here, the size figures for  $t_{vx}^W$  show some deviations in the left and right tails. For  $T = 500$ ,  $t_{vx}^W$  is undersized in the left tail for  $c = 0, 1, 5$  or  $10$  with values ranging from 0.04% to 1.00%. The size figures for the left tail of  $t_{vx}^W$  increase to around 3% when  $c = 50$ . On the other hand  $t_{vx}^W$  is over-sized in the right tail whether  $c$  is small or large. All in all, the differences to Table 1 are not essential.

### References

Phillips, P. C. B. and V. Solo (1992). Asymptotics for linear processes. *The Annals of Statistics* 20(2), 971–1001.

Table S.1: Size properties of different tests under short-run dynamics and a GARCH(1,1) specification for  $u_t$  in (1)

|     |            | $T = 500$ |                |            |            |             |                |            |            |          |                |            |            |            |                |            |            |             |                |            |            |          |                |            |            |
|-----|------------|-----------|----------------|------------|------------|-------------|----------------|------------|------------|----------|----------------|------------|------------|------------|----------------|------------|------------|-------------|----------------|------------|------------|----------|----------------|------------|------------|
|     |            | 2-sided   |                |            |            | right-sided |                |            |            | 2-sided  |                |            |            | left-sided |                |            |            | right-sided |                |            |            |          |                |            |            |
| $c$ | $\gamma_1$ | $t_{vx}$  | $t_{vx}^{rec}$ | $t_{vx}^W$ | $t_{vx}^*$ | $t_{vx}$    | $t_{vx}^{rec}$ | $t_{vx}^W$ | $t_{vx}^*$ | $t_{vx}$ | $t_{vx}^{rec}$ | $t_{vx}^W$ | $t_{vx}^*$ | $t_{vx}$   | $t_{vx}^{rec}$ | $t_{vx}^W$ | $t_{vx}^*$ | $t_{vx}$    | $t_{vx}^{rec}$ | $t_{vx}^W$ | $t_{vx}^*$ | $t_{vx}$ | $t_{vx}^{rec}$ | $t_{vx}^W$ | $t_{vx}^*$ |
| 0   | 0.50       | 21.03     | 5.02           | 4.53       | 4.68       | 0.13        | 3.21           | 0.07       | 4.06       | 33.00    | 6.67           | 8.99       | 5.57       | 20.50      | 4.94           | 4.31       | 4.19       | 0.13        | 2.99           | 0.08       | 4.08       | 32.17    | 6.80           | 8.81       | 5.20       |
|     | 0.70       | 21.70     | 4.73           | 4.67       | 4.59       | 0.13        | 3.10           | 0.05       | 4.09       | 33.52    | 6.83           | 9.12       | 5.57       | 20.47      | 4.35           | 4.40       | 4.16       | 0.11        | 3.05           | 0.04       | 3.69       | 32.46    | 6.29           | 8.59       | 5.17       |
|     | 0.80       | 20.29     | 4.82           | 4.77       | 4.56       | 0.14        | 3.02           | 0.06       | 4.30       | 32.45    | 6.72           | 8.84       | 5.50       | 20.69      | 5.45           | 4.51       | 4.50       | 0.13        | 3.08           | 0.09       | 3.92       | 32.59    | 6.87           | 8.76       | 5.58       |
|     | 0.85       | 20.71     | 5.30           | 4.65       | 4.69       | 0.11        | 3.19           | 0.08       | 4.34       | 32.60    | 7.41           | 9.12       | 5.70       | 20.17      | 4.75           | 4.46       | 4.66       | 0.11        | 2.84           | 0.09       | 3.96       | 32.01    | 6.93           | 8.93       | 5.67       |
|     | 0.89       | 20.89     | 5.24           | 5.10       | 4.65       | 0.16        | 2.84           | 0.07       | 4.05       | 32.32    | 7.32           | 9.53       | 5.84       | 19.77      | 5.28           | 4.47       | 4.15       | 0.20        | 3.51           | 0.17       | 4.05       | 30.73    | 6.84           | 8.95       | 5.12       |
|     | 0.50       | 16.13     | 4.70           | 5.32       | 5.65       | 0.26        | 2.92           | 0.15       | 5.25       | 26.15    | 6.73           | 9.97       | 6.13       | 15.26      | 4.98           | 4.40       | 6.02       | 0.29        | 3.18           | 0.16       | 6.02       | 24.87    | 6.95           | 8.99       | 5.79       |
|     | 0.70       | 15.35     | 4.70           | 4.80       | 5.36       | 0.23        | 3.16           | 0.15       | 5.55       | 25.81    | 6.58           | 9.77       | 5.94       | 15.77      | 5.26           | 4.72       | 5.43       | 0.26        | 3.14           | 0.14       | 5.38       | 25.06    | 7.20           | 9.33       | 5.80       |
|     | 1          | 15.57     | 4.69           | 4.68       | 5.07       | 0.27        | 3.02           | 0.16       | 5.35       | 24.70    | 6.79           | 9.36       | 5.48       | 16.02      | 4.88           | 4.70       | 5.69       | 0.32        | 2.84           | 0.21       | 5.99       | 25.49    | 7.03           | 9.24       | 5.80       |
|     | 0.85       | 15.40     | 5.51           | 4.98       | 5.51       | 0.21        | 3.29           | 0.10       | 5.41       | 24.42    | 7.20           | 9.48       | 5.83       | 14.96      | 4.83           | 4.52       | 5.63       | 0.26        | 3.11           | 0.12       | 5.90       | 24.12    | 6.50           | 9.23       | 5.59       |
|     | 0.89       | 15.78     | 5.01           | 5.27       | 5.82       | 0.28        | 3.26           | 0.14       | 5.50       | 25.00    | 7.19           | 10.54      | 5.84       | 14.60      | 5.29           | 4.84       | 6.26       | 0.24        | 3.24           | 0.20       | 6.10       | 23.39    | 6.87           | 9.40       | 5.88       |
|     | 0.50       | 10.02     | 5.17           | 6.08       | 5.60       | 1.12        | 3.11           | 0.87       | 4.17       | 15.92    | 7.10           | 10.62      | 6.20       | 9.27       | 4.99           | 5.00       | 4.96       | 1.17        | 3.20           | 0.99       | 4.26       | 14.64    | 6.79           | 9.42       | 5.40       |
|     | 0.70       | 9.82      | 5.13           | 5.60       | 5.50       | 1.27        | 3.04           | 1.01       | 4.67       | 15.54    | 7.23           | 10.22      | 5.77       | 8.97       | 5.05           | 4.97       | 5.12       | 1.03        | 3.43           | 0.76       | 4.53       | 14.93    | 6.61           | 9.33       | 5.60       |
|     | 0.80       | 9.44      | 4.89           | 5.22       | 5.04       | 1.08        | 3.22           | 0.80       | 4.11       | 15.59    | 6.69           | 10.14      | 5.54       | 9.34       | 5.07           | 5.57       | 5.06       | 1.13        | 3.14           | 0.82       | 4.26       | 14.86    | 6.91           | 9.93       | 5.67       |
|     | 0.85       | 9.47      | 4.90           | 5.79       | 5.23       | 1.31        | 3.05           | 1.03       | 4.40       | 14.75    | 6.74           | 9.76       | 5.86       | 9.07       | 5.11           | 5.32       | 5.49       | 1.27        | 3.09           | 0.98       | 4.80       | 14.69    | 6.72           | 9.63       | 5.74       |
|     | 0.89       | 9.63      | 5.45           | 5.86       | 5.54       | 1.33        | 3.31           | 0.97       | 4.45       | 15.11    | 7.46           | 10.41      | 6.01       | 8.54       | 5.09           | 4.87       | 5.05       | 1.34        | 3.11           | 1.00       | 4.51       | 14.14    | 6.75           | 9.36       | 5.27       |
|     | 0.50       | 7.70      | 4.86           | 5.87       | 3.84       | 1.92        | 3.28           | 1.72       | 2.98       | 12.18    | 6.76           | 9.62       | 5.35       | 7.91       | 5.05           | 5.99       | 3.92       | 2.02        | 3.68           | 1.82       | 3.08       | 12.09    | 6.53           | 9.48       | 5.52       |
|     | 0.70       | 7.66      | 4.92           | 5.66       | 4.21       | 1.96        | 3.28           | 1.66       | 2.97       | 11.84    | 6.49           | 9.48       | 5.17       | 7.32       | 4.65           | 5.44       | 3.59       | 1.80        | 3.26           | 1.51       | 2.55       | 11.65    | 6.13           | 9.40       | 5.13       |
|     | 0.80       | 7.85      | 4.93           | 5.90       | 4.07       | 1.88        | 3.49           | 1.63       | 2.95       | 11.82    | 6.61           | 9.70       | 5.40       | 7.73       | 4.97           | 5.52       | 4.12       | 2.12        | 3.48           | 1.90       | 3.29       | 11.78    | 6.51           | 9.06       | 5.26       |
|     | 0.85       | 7.77      | 4.56           | 5.70       | 4.16       | 2.00        | 3.06           | 1.76       | 3.00       | 11.87    | 6.23           | 9.60       | 5.13       | 7.42       | 4.78           | 5.60       | 4.08       | 1.94        | 3.29           | 1.61       | 2.92       | 11.50    | 6.66           | 9.29       | 5.15       |
|     | 0.89       | 8.03      | 5.06           | 6.23       | 4.47       | 1.86        | 3.23           | 1.68       | 3.09       | 11.99    | 6.69           | 9.74       | 5.65       | 7.08       | 4.97           | 5.38       | 3.88       | 1.70        | 2.99           | 1.39       | 2.70       | 11.71    | 6.87           | 9.61       | 5.20       |
|     | 0.50       | 6.29      | 5.22           | 5.74       | 3.96       | 2.96        | 3.78           | 2.80       | 3.18       | 9.21     | 6.38           | 8.68       | 5.25       | 5.97       | 4.94           | 5.42       | 3.69       | 2.97        | 3.74           | 2.80       | 3.09       | 8.66     | 6.17           | 8.14       | 4.93       |
|     | 0.70       | 6.46      | 5.00           | 5.89       | 4.15       | 3.08        | 3.85           | 2.94       | 3.17       | 8.76     | 6.19           | 8.26       | 5.21       | 6.18       | 4.94           | 5.56       | 3.76       | 2.90        | 4.01           | 2.71       | 3.06       | 8.83     | 6.02           | 8.32       | 5.10       |
|     | 0.80       | 6.30      | 5.18           | 5.77       | 3.95       | 3.14        | 3.92           | 3.05       | 3.50       | 8.76     | 6.23           | 8.34       | 5.09       | 5.53       | 4.59           | 5.04       | 3.58       | 2.96        | 3.89           | 2.81       | 3.15       | 8.05     | 5.54           | 7.30       | 4.32       |
|     | 0.85       | 6.70      | 5.04           | 6.26       | 4.20       | 3.11        | 3.77           | 2.96       | 3.34       | 9.23     | 5.98           | 8.75       | 5.45       | 6.46       | 4.92           | 5.89       | 4.22       | 3.10        | 3.90           | 2.89       | 3.19       | 8.85     | 6.32           | 8.22       | 5.23       |
|     | 0.89       | 6.64      | 4.63           | 6.09       | 3.98       | 3.00        | 3.56           | 2.82       | 3.33       | 9.07     | 6.10           | 8.46       | 5.42       | 6.41       | 5.32           | 5.85       | 4.17       | 3.09        | 3.78           | 2.86       | 3.14       | 8.90     | 6.50           | 8.34       | 5.34       |
|     | 0.50       | 6.42      | 4.99           | 6.03       | 4.20       | 3.51        | 3.91           | 3.40       | 3.63       | 8.63     | 6.24           | 8.28       | 5.57       | 6.29       | 5.23           | 5.99       | 4.35       | 3.58        | 4.09           | 3.48       | 3.69       | 7.98     | 6.00           | 7.80       | 5.40       |
|     | 0.70       | 5.91      | 5.25           | 5.61       | 4.16       | 3.28        | 3.90           | 3.10       | 3.43       | 8.06     | 6.24           | 7.76       | 5.20       | 5.93       | 4.92           | 5.63       | 4.06       | 3.30        | 3.95           | 3.22       | 3.37       | 7.73     | 6.06           | 7.54       | 5.02       |
|     | 0.80       | 6.25      | 5.25           | 5.98       | 4.53       | 3.40        | 3.87           | 3.35       | 3.48       | 8.16     | 6.04           | 7.93       | 5.42       | 6.04       | 4.86           | 5.77       | 4.02       | 3.51        | 4.02           | 3.42       | 3.58       | 7.97     | 5.90           | 7.67       | 5.18       |
|     | 0.85       | 5.92      | 5.03           | 5.68       | 4.38       | 3.52        | 3.99           | 3.41       | 3.69       | 7.67     | 5.81           | 7.36       | 4.95       | 5.97       | 4.99           | 5.68       | 4.13       | 3.31        | 3.97           | 3.24       | 3.44       | 7.69     | 5.72           | 7.39       | 4.88       |
|     | 0.89       | 6.03      | 5.11           | 5.77       | 4.26       | 3.38        | 3.73           | 3.29       | 3.52       | 8.07     | 5.99           | 7.88       | 5.32       | 5.62       | 5.08           | 5.36       | 3.83       | 3.50        | 4.17           | 3.35       | 3.61       | 7.64     | 5.83           | 7.41       | 4.87       |

Note: Data generated with (S.8) and (S.9) with  $v_t = \phi v_t + \nu_t$  for  $\phi = 0.5$  and  $u_t = \sigma_t \varepsilon_t$  with  $\sigma_t^2 = \alpha_0 + \alpha_1 \varepsilon_{t-1}^2 + \gamma_1 \sigma_{t-1}^2$ , where  $(\varepsilon_t, \nu_t) \sim iid N(0, \Sigma)$  when the diagonal elements of  $\Sigma$  are identity and the correlation coefficient is  $\delta = -0.95$ . We set  $\rho = 1 - c/T$  for various  $c$  and  $\varrho = 1 - 1/T^{0.95}$  and use standard normal critical values. See text for details.
